# Supplementary material
Source: Springer Nature journal article supplement (https://www.springermedizin.de/resource/supplementary/12888_2013_1631_MOESM2_ESM.pdf/9480994)
Supplement: MOESM2 [file 9480994]

## Additional file 2: Pre- and Post-Intervention Response Characteristics for OMS-HC

| Item | Pre-test                                                                                                                                                      |      |      |          | Post-test |      |      |          |      |
|------|---------------------------------------------------------------------------------------------------------------------------------------------------------------|------|------|----------|-----------|------|------|----------|------|
|      | n                                                                                                                                                             | Mean | SD   | SA/A (%) | n         | Mean | SD   | SA/A (%) |      |
| 1    | I am more comfortable helping a person who has a physical illness than I am helping a person who has a mental illness.                                        | 1521 | 2.92 | 1.16     | 38.7      | 880  | 2.64 | 1.11     | 29.7 |
| 2    | If a person with a mental illness complains of physical symptoms (e.g. nausea, back pain or headache), I would likely attribute this to their mental illness. | 1520 | 2.38 | 0.86     | 11.2      | 879  | 2.16 | 0.84     | 8.4  |
| 3*   | If a colleague with whom I work told me they had a managed mental illness, I would be as willing to work with him/her.                                        | 1485 | 1.69 | 0.76     | 91.5      | 855  | 1.68 | 0.71     | 94.2 |
| 4    | If I were under treatment for a mental illness I would not disclose this to any of my colleagues.                                                             | 1518 | 3.38 | 1.02     | 48.9      | 880  | 3.14 | 0.93     | 35.7 |
| 5    | I would be more inclined to seek help for a mental illness if my treating healthcare provider was <u>not</u> associated with my workplace.                    | 1338 | 3.92 | 0.94     | 76.8      | 695  | 3.67 | 0.97     | 67.6 |
| 6    | I would see myself as weak if I had a mental illness and could <u>not</u> fix it myself.                                                                      | 1520 | 2.63 | 1.07     | 26.2      | 877  | 2.41 | 0.99     | 17.1 |
| 7    | I would be reluctant to seek help if I had a mental illness.                                                                                                  | 1520 | 2.47 | 1.04     | 22.1      | 879  | 2.26 | 0.99     | 16.0 |
| 8*   | Employers should hire a person with a managed mental illness if he/she is the best person for the job.                                                        | 1485 | 1.65 | 0.70     | 92.5      | 853  | 1.53 | 0.59     | 97.2 |
| 9*   | I would still go to a physician if I knew that the physician had been treated for a mental illness.                                                           | 1486 | 2.02 | 0.75     | 80.2      | 852  | 1.97 | 0.75     | 83.1 |
| 10*  | If I had a mental illness, I would tell my friends.                                                                                                           | 1515 | 2.74 | 1.00     | 45.6      | 872  | 2.60 | 0.93     | 51.2 |
| 11*  | It is the responsibility of healthcare providers to inspire hope in people with mental illness.                                                               | 1485 | 1.90 | 0.76     | 83.5      | 853  | 1.84 | 0.78     | 86.9 |
| 12   | Despite my professional beliefs, I have negative reactions towards people who have mental illness.                                                            | 1517 | 2.19 | 0.96     | 12.7      | 872  | 1.98 | 0.86     | 8.0  |
| 13   | There is little I can do to help people with mental illness.                                                                                                  | 1516 | 1.91 | 0.84     | 5.5       | 877  | 1.82 | 0.74     | 3.9  |
| 14   | More than half of people with mental illness don't try hard enough to get better.                                                                             | 1517 | 2.09 | 0.86     | 6.9       | 877  | 1.89 | 0.76     | 3.7  |
| 15*  | People with mental illness seldom pose a risk to the public.                                                                                                  | 1481 | 2.54 | 1.00     | 55.8      | 852  | 2.40 | 1.00     | 65.0 |
| 16   | The best treatment for mental illness is medication.                                                                                                          | 1486 | 2.45 | 0.78     | 8.3       | 853  | 2.34 | 0.80     | 8.0  |
| 17   | I would <u>not</u> want a person with a mental illness, even if it were appropriately managed, to work with children.                                         | 1484 | 2.24 | 0.78     | 6.5       | 853  | 2.14 | 0.76     | 5.5  |
| 18   | Healthcare providers do <u>not</u> need to be advocates for people with mental illness.                                                                       | 1513 | 1.66 | 0.72     | 2.3       | 876  | 1.64 | 0.76     | 2.7  |
| 19*  | I would <u>not</u> mind if a person with a mental illness lived next door to me.                                                                              | 1482 | 2.01 | 0.80     | 80.4      | 852  | 1.89 | 0.74     | 86.4 |
| 20   | I struggle to feel compassion for a person with a mental illness.                                                                                             | 1515 | 1.80 | 0.81     | 5.3       | 878  | 1.65 | 0.73     | 3.0  |

\*Reversed scored items(anchors should read, from left to right, strongly agree, agree, neither agree or disagree, disagree, strongly disagree); SA/A = percentage of respondents agreeing or strongly agreeing to statement
